# Supplementary material for: The Impact of Immunoglobulin G1 Fc Sialylation on Backbone Amide H/D Exchange
Source: Antibodies (Basel). 2019 Oct 1;8(4):49. doi: 10.3390/antib8040049 (PMC6963987; doi:10.3390/antib8040049)
Supplement: Supplementary file 1 [file antibodies-08-00049-s001.pdf]

# Impact of immunoglobulin G1 Fc sialylation on backbone amide H/D exchange

## Supplementary Materials

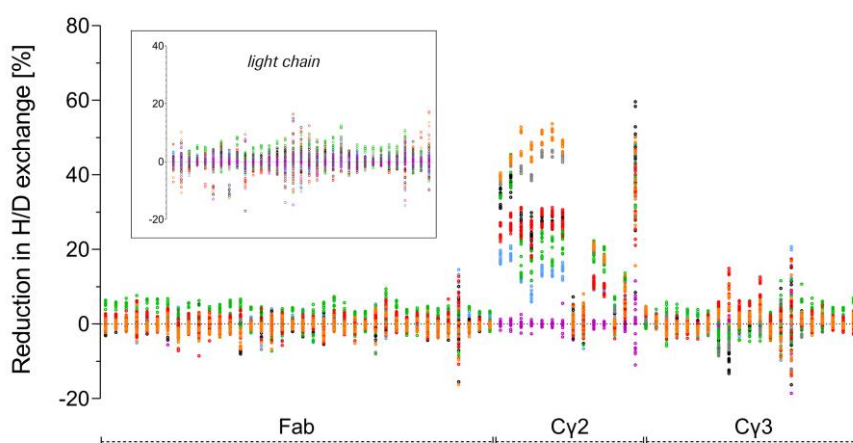

**Figure S1.** Reduction in H/DX [%] of trastuzumab glycan variant peptides (*whole sequence*), resulting from pepsin and pepsin/type XIII digestion (sequence coverage 81–98% and 87–94% for light and heavy chains, respectively). The relative reduction of the different glycan variants was normalized with the de-glycosylated trastuzumab sample (Degly) data. Depicted are single peptide values (summarized in Table S1) of three targeted (10 min H/DX) experiments with trastuzumab Man5 (light blue), G0F (green), RM (black), ST3 (red), G2F (gray) and ST6 (orange) and Degly (purple). Only minor alterations in H/DX were observed for the analyzed light chain peptides (see inset).

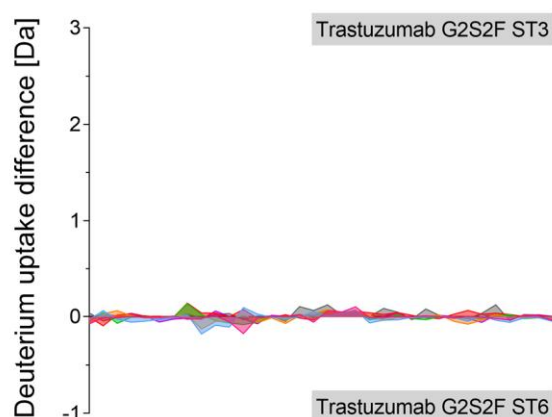

**Figure S2.** Uptake difference plot showing D uptake [Da] of alternatively linked trastuzumab sialylation variants (*light chain only*). Shown are peptides ( $n=3$ ) obtained by pepsin/type XIII digestion (sequence coverage 83%). The H/DX time course experiment was performed for 0.5 min (pink), 1 min (light blue), 10 min (orange), 30 min (green), 1 h (red), 3 h (purple) and 48 h (black).

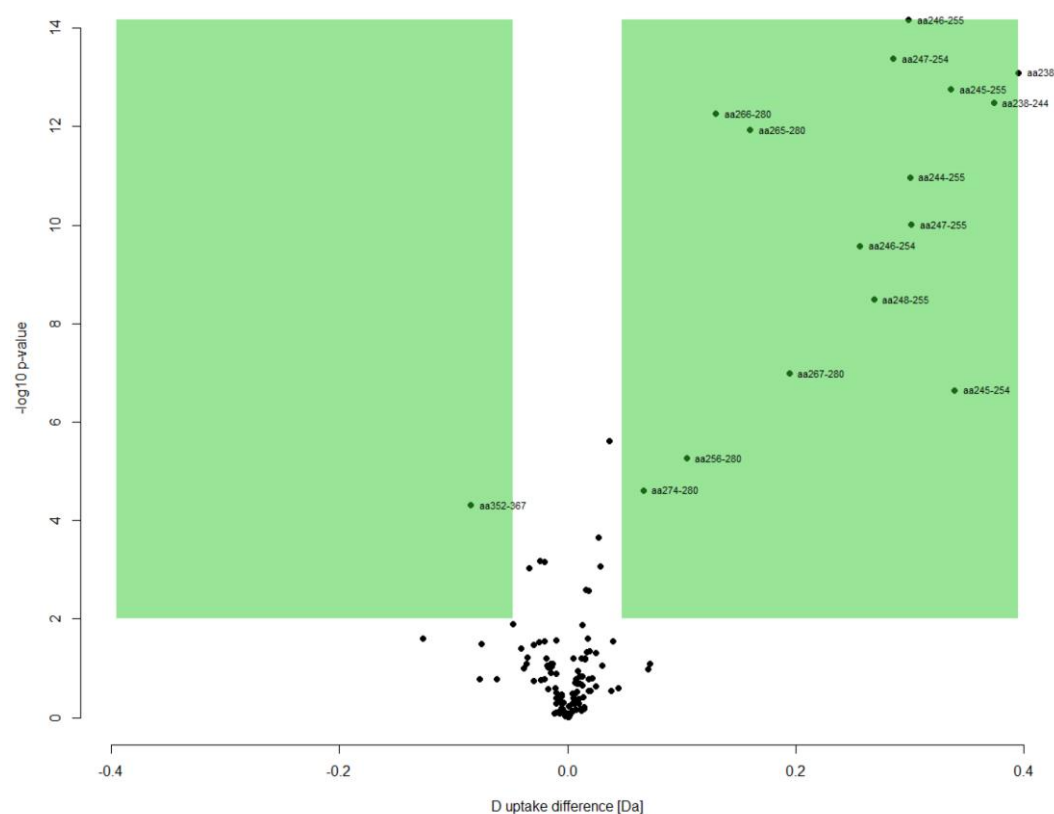

**Figure S3.** Volcano plot showing statistical significance testing of trastuzumab ST3 and ST6 D uptake differences, as proposed by Hagemann et al. [59]. For statistical significance testing of D uptake differences, Welch's *t*-test was performed ( $n=6$ ). Corresponding *p*-values are depicted. Significant hits are located within the green rectangle and defined by an  $\alpha=0.01$  and a global significance threshold of  $\pm 0.05$  Da, as calculated according to Hagemann et al. [59].

**Table S1.** D uptake differences and reduction in H/DX values, as shown in *Figure 2* and *Figure 3*.

|           | Trastuzumab Degly <sup>(+ + +)</sup>                                                                                                                  | Trastuzumab RM <sup>(+ + +)</sup> | Trastuzumab Man5 <sup>(+ +)</sup> | Trastuzumab ST3 <sup>(+ + +)</sup> | Trastuzumab ST6 <sup>(+ +)</sup> | Trastuzumab G0F <sup>(+ +)</sup> | Trastuzumab G2F <sup>(+)</sup> |
|-----------|-------------------------------------------------------------------------------------------------------------------------------------------------------|-----------------------------------|-----------------------------------|------------------------------------|----------------------------------|----------------------------------|--------------------------------|
|           | Deuterium uptake difference of trastuzumab RM [Da], average values of n=6 replicates                                                                  |                                   |                                   |                                    |                                  |                                  |                                |
| aa186-197 | 0.0                                                                                                                                                   | -                                 | 0.1                               | 0.0                                | 0.0                              | 0.0                              | 0.0                            |
| aa235-240 | -0.8                                                                                                                                                  | -                                 | -0.4                              | -0.3                               | 0.1                              | 0.0                              | 0.1                            |
| aa235-241 | -0.8                                                                                                                                                  | -                                 | -0.4                              | -0.3                               | 0.1                              | 0.0                              | 0.1                            |
| aa241-252 | -0.8                                                                                                                                                  | -                                 | -0.4                              | 0.0                                | 0.6                              | -0.3                             | 0.5                            |
| aa242-251 | -0.6                                                                                                                                                  | -                                 | -0.4                              | 0.0                                | 0.6                              | -0.3                             | 0.5                            |
| aa242-252 | -0.8                                                                                                                                                  | -                                 | -0.4                              | 0.0                                | 0.7                              | -0.3                             | 0.6                            |
| aa243-252 | -0.7                                                                                                                                                  | -                                 | -0.4                              | -0.1                               | 0.5                              | -0.2                             | 0.4                            |
| aa244-252 | -0.8                                                                                                                                                  | -                                 | -0.4                              | 0.0                                | 0.6                              | -0.2                             | 0.4                            |
| aa253-261 | 0.0                                                                                                                                                   | -                                 | 0.0                               | 0.0                                | 0.0                              | -0.1                             | 0.0                            |
| aa253-262 | 0.0                                                                                                                                                   | -                                 | 0.0                               | 0.0                                | 0.0                              | 0.0                              | 0.0                            |
| aa262-277 | -0.9                                                                                                                                                  | -                                 | -0.4                              | -0.4                               | 0.0                              | -0.1                             | 0.0                            |
| aa263-277 | -0.8                                                                                                                                                  | -                                 | -0.4                              | -0.4                               | 0.0                              | -0.1                             | 0.0                            |
| aa266-277 | -0.1                                                                                                                                                  | -                                 | 0.1                               | -0.1                               | -0.1                             | 0.0                              | 0.0                            |
| aa271-277 | -0.2                                                                                                                                                  | -                                 | -0.1                              | -0.1                               | 0.0                              | 0.0                              | 0.0                            |
|           | Reduction in H/DX normalized on trastuzumab Degly [%], average values of n=6 <sup>(+)</sup> , 12 <sup>(+ +)</sup> or 18 <sup>(+ + +)</sup> replicates |                                   |                                   |                                    |                                  |                                  |                                |
| aa185-195 | 0.0±0.0                                                                                                                                               | 0.3±1.0                           | 1.5±1.4                           | 0.1±0.8                            | -0.5±0.7                         | 1.2±1.9                          | 0.7±0.8                        |
| aa186-197 | 0.0±0.0                                                                                                                                               | 0.0±0.6                           | 0.9±1.4                           | 0.0±0.4                            | -0.2±0.6                         | 1.4±2.1                          | 0.3±0.3                        |
| aa235-240 | 0.0±0.0                                                                                                                                               | 33.9±1.9                          | 17.9±1.3                          | 24.5±1.8                           | 39.6±0.5                         | 37.0±2.5                         | 37.9±0.5                       |
| aa235-241 | 0.0±0.0                                                                                                                                               | 38.2±1.7                          | 19.0±1.4                          | 27.1±1.8                           | 44.3±0.7                         | 41.2±3.7                         | 43.3±0.7                       |
| aa241-252 | 0.0±0.0                                                                                                                                               | 26.2±1.9                          | 12.5±0.7                          | 27.1±3                             | 48.7±3.3                         | 18.2±4.3                         | 41.4±0.7                       |
| aa242-251 | 0.0±0.0                                                                                                                                               | 24.5±2.8                          | 8.0±1.7                           | 24.6±3.6                           | 45.9±2.0                         | 16.5±2.2                         | 39.3±0.6                       |
| aa242-252 | 0.0±0.0                                                                                                                                               | 27.7±0.9                          | 14.4±0.9                          | 29±1.8                             | 50.0±1.6                         | 21.5±3                           | 45.6±0.8                       |
| aa243-252 | 0.0±0.0                                                                                                                                               | 27.1±1.4                          | 13.8±0.6                          | 27.6±2.0                           | 50.9±1.5                         | 19.9±3.2                         | 45.9±0.8                       |
| aa244-252 | 0.0±0.0                                                                                                                                               | 27.3±2.3                          | 14.5±1.5                          | 27.6±2.0                           | 48.2±1.3                         | 22.2±2.6                         | 44.7±0.8                       |
| aa253-261 | 0.0±0.0                                                                                                                                               | 1.4±2.7                           | -0.9±1.6                          | 0.2±2.0                            | 1.0±1.9                          | 0.6±1.9                          | 0.2±2.3                        |
| aa253-262 | 0.0±0.0                                                                                                                                               | 0.7±2.6                           | -2.0±2.6                          | 0.0±2.4                            | 2.5±3.5                          | -0.2±3.3                         | -0.2±0.8                       |
| aa262-277 | 0.0±0.0                                                                                                                                               | 19.9±0.7                          | 10.6±0.7                          | 11.1±1.0                           | 20.7±0.5                         | 19.9±2.1                         | 19.9±0.3                       |
| aa263-277 | 0.0±0.0                                                                                                                                               | 17.2±0.6                          | 9.1±0.6                           | 9.5±1.2                            | 17.6±0.6                         | 17.9±2.8                         | 17.4±0.5                       |
| aa266-277 | 0.0±0.0                                                                                                                                               | 0.5±1.4                           | 1.5±2.9                           | -0.7±1.2                           | 0.0±1.2                          | 2.8±3.9                          | 3.0±1.6                        |
| aa271-277 | 0.0±0.0                                                                                                                                               | 8.9±4.2                           | 6.5±1.5                           | 4.4±2.3                            | 7.1±3.6                          | 11.6±1.5                         | 10.0±0.8                       |

**Table S2.** Relative FcγR binding of trastuzumab glycan variants (normalized with trastuzumab starting material), as shown in *Figure 4*.

|                 | Trastuzumab                           | Trastuzumab RM | Trastuzumab Degly | Trastuzumab G0F | Trastuzumab G2F | Trastuzumab ST3 | Trastuzumab ST6 |
|-----------------|---------------------------------------|----------------|-------------------|-----------------|-----------------|-----------------|-----------------|
|                 | Relative binding, normalized [%], n=3 |                |                   |                 |                 |                 |                 |
| FcRn            | 100±0.7                               | 133.2±1.2      | 106.6±2.7         | 94.9±2.3        | 106.5±1.0       | 79.8±0.9        | 127.4±0.9       |
| FcγRIa          | 100±0.1                               | 103.0±0.1      | 31.6±0.2          | 96.6±0.2        | 102.2±0.1       | 94.2±0.0        | 100.4±5.3       |
| FcγRIIIa (R131) | 100±0.7                               | 107.3±0.4      | 1.0±0.0           | 95.4±0.5        | 93.9±0.7        | 64.1±0.6        | 129.5±2.2       |
| FcγRIIIa (H131) | 100±0.1                               | 98.3±0.2       | 0.8±1.6           | 89.7±0.1        | 102.3±0.2       | 74.9±0.6        | 119.9±0.2       |
| FcγRIIIb/c      | 100±3.7                               | 103.1±3.5      | -0.1±0.0          | 95.9±4.0        | 100.0±3.1       | 87.0±2.6        | 161.5±3.7       |
| FcγRIIIa (V158) | 100±0.2                               | 105.3±0.1      | 0.9±1.6           | 94.5±0.2        | 120.4±0.1       | 78.2±0.5        | 121.3±0.1       |
| FcγRIIIa (F158) | 100±0.1                               | 102.8±0.2      | 0.6±4.2           | 88.4±0.2        | 123.7±0.2       | 61.9±0.6        | 149.9±0.1       |

**Table S3.** D uptake differences of trastuzumab G2S2F ST3 vs. ST6, as shown in *Figure 5*.

|           | Deuterium uptake difference of trastuzumab G2S2F ST3 vs. trastuzumab G2S2F ST6 [Da], n=3 |       |        |        |      |      |      |
|-----------|------------------------------------------------------------------------------------------|-------|--------|--------|------|------|------|
|           | 0.5 min                                                                                  | 1 min | 10 min | 30 min | 1 h  | 3 h  | 48 h |
| aa185-197 | -0.1                                                                                     | -0.1  | 0.0    | -0.1   | 0.0  | 0.0  | 0.0  |
| aa189-197 | -0.1                                                                                     | -0.1  | 0.0    | 0.0    | 0.0  | 0.0  | 0.0  |
| aa235-240 | 0.1                                                                                      | 0.1   | 0.4    | 0.3    | 0.3  | 0.1  | 0.0  |
| aa235-241 | 0.1                                                                                      | 0.1   | 0.3    | 0.4    | 0.3  | 0.2  | 0.2  |
| aa241-251 | 0.1                                                                                      | 0.1   | 0.6    | 0.6    | 0.5  | 0.3  | 0.1  |
| aa242-251 | 0.1                                                                                      | 0.2   | 0.6    | 0.6    | 0.5  | 0.3  | 0.0  |
| aa242-252 | 0.1                                                                                      | 0.1   | 0.6    | 0.6    | 0.6  | 0.3  | 0.0  |
| aa243-252 | 0.1                                                                                      | 0.1   | 0.5    | 0.5    | 0.5  | 0.3  | 0.1  |
| aa244-251 | 0.1                                                                                      | 0.1   | 0.5    | 0.5    | 0.4  | 0.2  | 0.0  |
| aa244-252 | 0.1                                                                                      | 0.1   | 0.6    | 0.6    | 0.5  | 0.3  | 0.0  |
| aa245-252 | 0.1                                                                                      | 0.1   | 0.5    | 0.5    | 0.4  | 0.3  | 0.0  |
| aa253-261 | -0.1                                                                                     | -0.1  | 0.1    | 0.1    | 0.1  | 0.3  | 0.1  |
| aa253-262 | -0.1                                                                                     | -0.1  | 0.0    | 0.0    | 0.0  | 0.1  | 0.0  |
| aa257-274 | 0.0                                                                                      | -0.1  | -0.1   | 0.0    | 0.0  | 0.0  | 0.0  |
| aa262-277 | 0.1                                                                                      | 0.1   | 0.2    | 0.3    | 0.4  | 0.3  | 0.0  |
| aa263-275 | 0.1                                                                                      | 0.1   | 0.4    | 0.6    | 0.7  | 0.6  | 0.0  |
| aa263-277 | 0.1                                                                                      | 0.1   | 0.3    | 0.5    | 0.6  | 0.5  | 0.0  |
| aa266-275 | 0.0                                                                                      | 0.0   | 0.0    | 0.0    | 0.0  | 0.1  | 0.0  |
| aa266-277 | 0.0                                                                                      | 0.0   | 0.0    | 0.0    | 0.0  | 0.0  | 0.0  |
| aa270-277 | 0.0                                                                                      | 0.0   | 0.0    | 0.0    | 0.0  | 0.1  | 0.0  |
| aa271-277 | 0.0                                                                                      | 0.0   | 0.0    | 0.1    | 0.1  | 0.1  | 0.0  |
| aa278-285 | 0.0                                                                                      | 0.0   | -0.1   | -0.1   | 0.0  | 0.1  | 0.0  |
| aa278-300 | 1.7                                                                                      | 2.4   | 1.2    | -0.2   | 0.0  | 0.0  | 0.0  |
| aa278-305 | 1.7                                                                                      | 2.6   | 1.6    | 0.9    | 1.0  | 1.0  | 1.3  |
| aa281-300 | 1.9                                                                                      | 2.4   | 1.3    | -0.1   | -0.1 | 0.1  | 0.2  |
| aa282-300 | 1.9                                                                                      | 2.5   | 1.2    | 0.0    | -0.1 | -0.1 | -0.1 |
| aa282-306 | 1.8                                                                                      | 2.4   | 1.6    | 0.8    | 0.8  | 1.0  | 1.4  |
| aa282-313 | 0.1                                                                                      | 0.1   | 0.1    | 0.4    | 0.4  | 0.6  | 0.2  |
| aa297-325 | 1.7                                                                                      | 2.3   | 1.6    | 0.7    | 0.8  | 1.0  | 1.3  |
| aa301-306 | 0.0                                                                                      | 0.0   | 0.0    | 0.0    | 0.1  | 0.2  | 0.5  |
| aa307-315 | 0.0                                                                                      | 0.0   | 0.0    | 0.0    | 0.1  | 0.1  | 0.0  |
| aa307-318 | 0.0                                                                                      | 0.0   | 0.0    | 0.0    | 0.0  | 0.1  | 0.1  |
